# Supplementary material for: Leveraging crystal defect modulation of Zirconium nano-MOF for enhanced water vapour confinement and photocatalytic behaviours
Source: Research Square preprint supplement (doi:10.21203/rs.3.rs-6727927/v1), 2025-05-29
Supplement: Supplementary file 1 [file 59d6f950fb704117502d62d6.docx]

SUPPORTING INFORMATION

**Leveraging crystal defect modulation of Zirconium nano-MOF for enhanced water vapour confinement and photocatalytic behaviours**

*Liang Ying Ee* a, b, Sean Yi Rong Chia a, Regina Pei Woon Tan a, Qian Ma a*

*a Department of Chemistry, College of Humanities and Sciences, National University of Singapore, 3 Science Drive 3, Singapore 117543, Singapore.*

*b Chemical Engineering Program, Physical Science and Engineering Division, King Abdullah University of Science and Technology, Thuwal, 23955-6900, Saudi Arabia.*

**Contents**

[1. Optimization of synthesis and characterization of UiO66NH2 2](#_Toc191034173)

[2. Modulator effect on bonding environments of synthesized UiO66NH2 11](#_Toc191034174)

# **Optimization of synthesis and characterization of UiO66NH2**


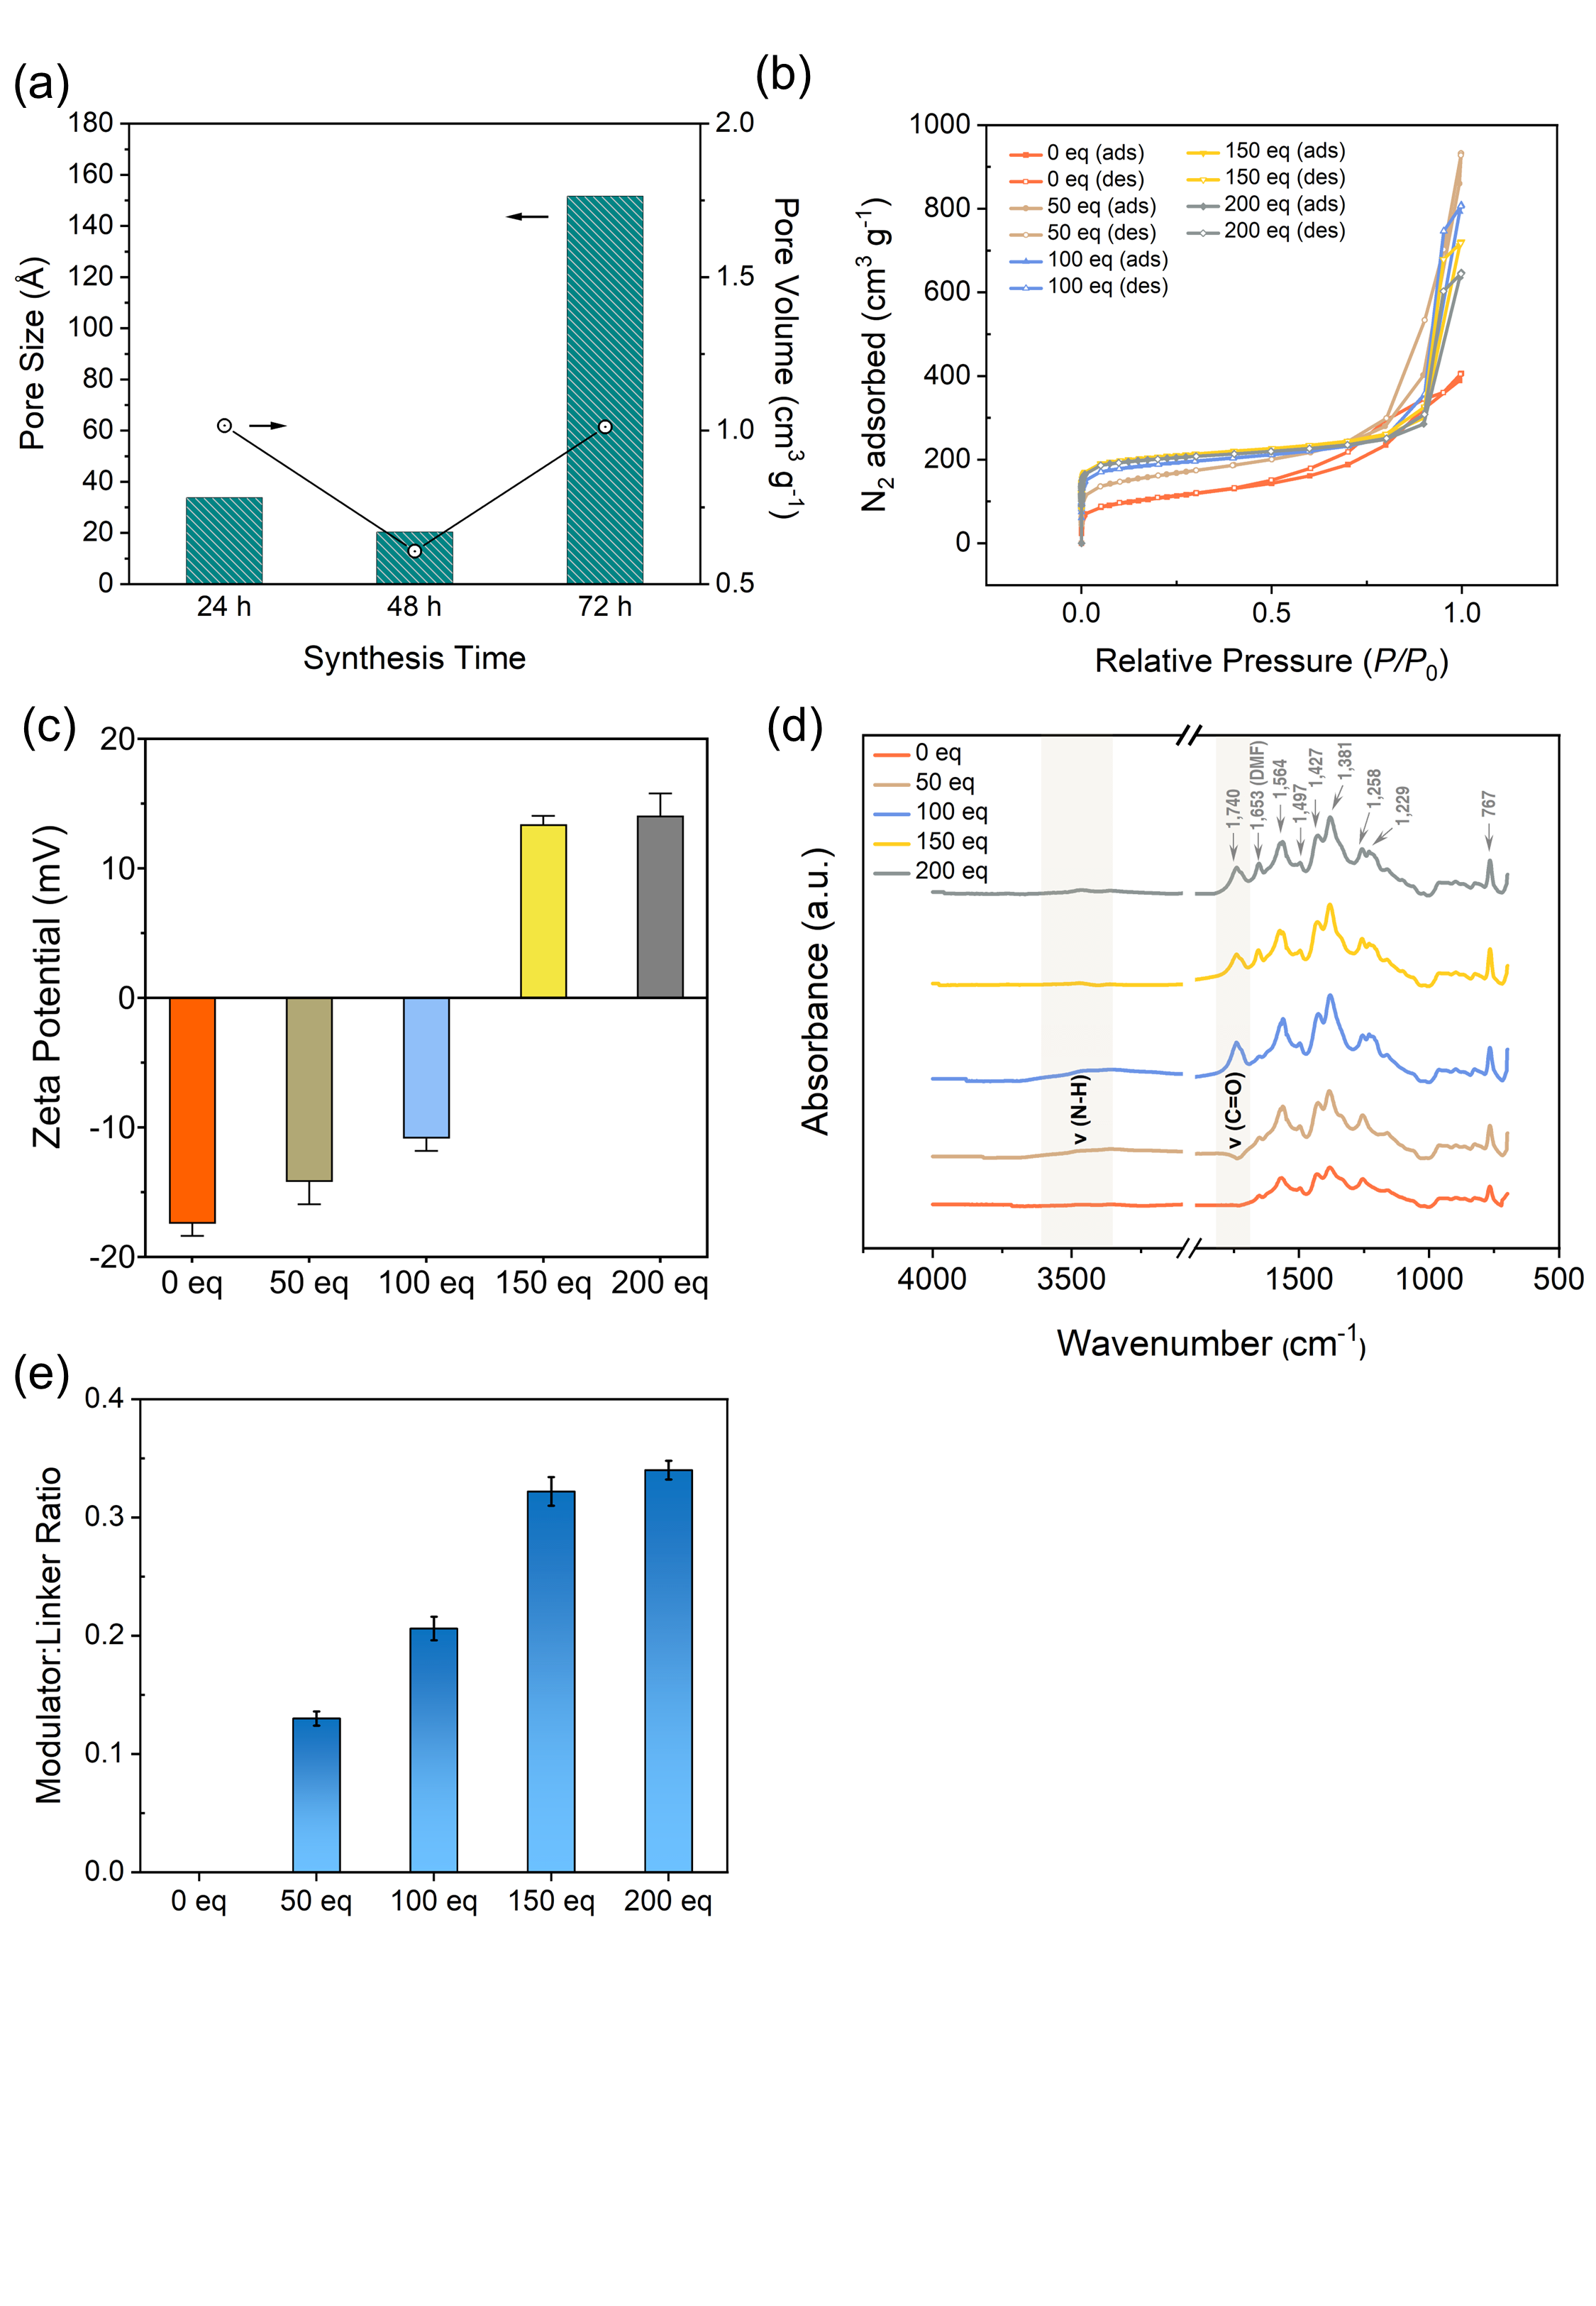


**Figure S1.1.** (a) BET analysis results of UiO66NH2 crystals under different synthesis time for their pore sizes and volumes; (b) BET N2 adsorption-desorption profile, (c) surface zeta potential, (d) ATR-FTIR spectra and (e) modulator:linker ratio calculated from 1H qNMR of UiO66NH2 samples.

**Table S1.1.** BET analysis results of UiO66NH2 samples.

| **Sample** | **Specific Surface Area (m2 g-1)** | **Micropore Surface Area (m2 g-1)** | **Mean Pore Size (nm)** | **Pore Volume (cm3 g-1)** |
| --- | --- | --- | --- | --- |
| UiO66NH2_0eq | 380.7 | 103.1 | 1.9 | 0.6 |
| UiO66NH2_50eq | 581.2 | 228.3 | 3.3 | 1.4 |
| UiO66NH2_100eq | 714.5 | 351.1 | 2.8 | 1.3 |
| UiO66NH2_150eq | 797.1 | 308.9 | 2.8 | 1.1 |
| UiO66NH2_200eq | 780.0 | 284.1 | 2.6 | 1.0 |
|  | | | | |


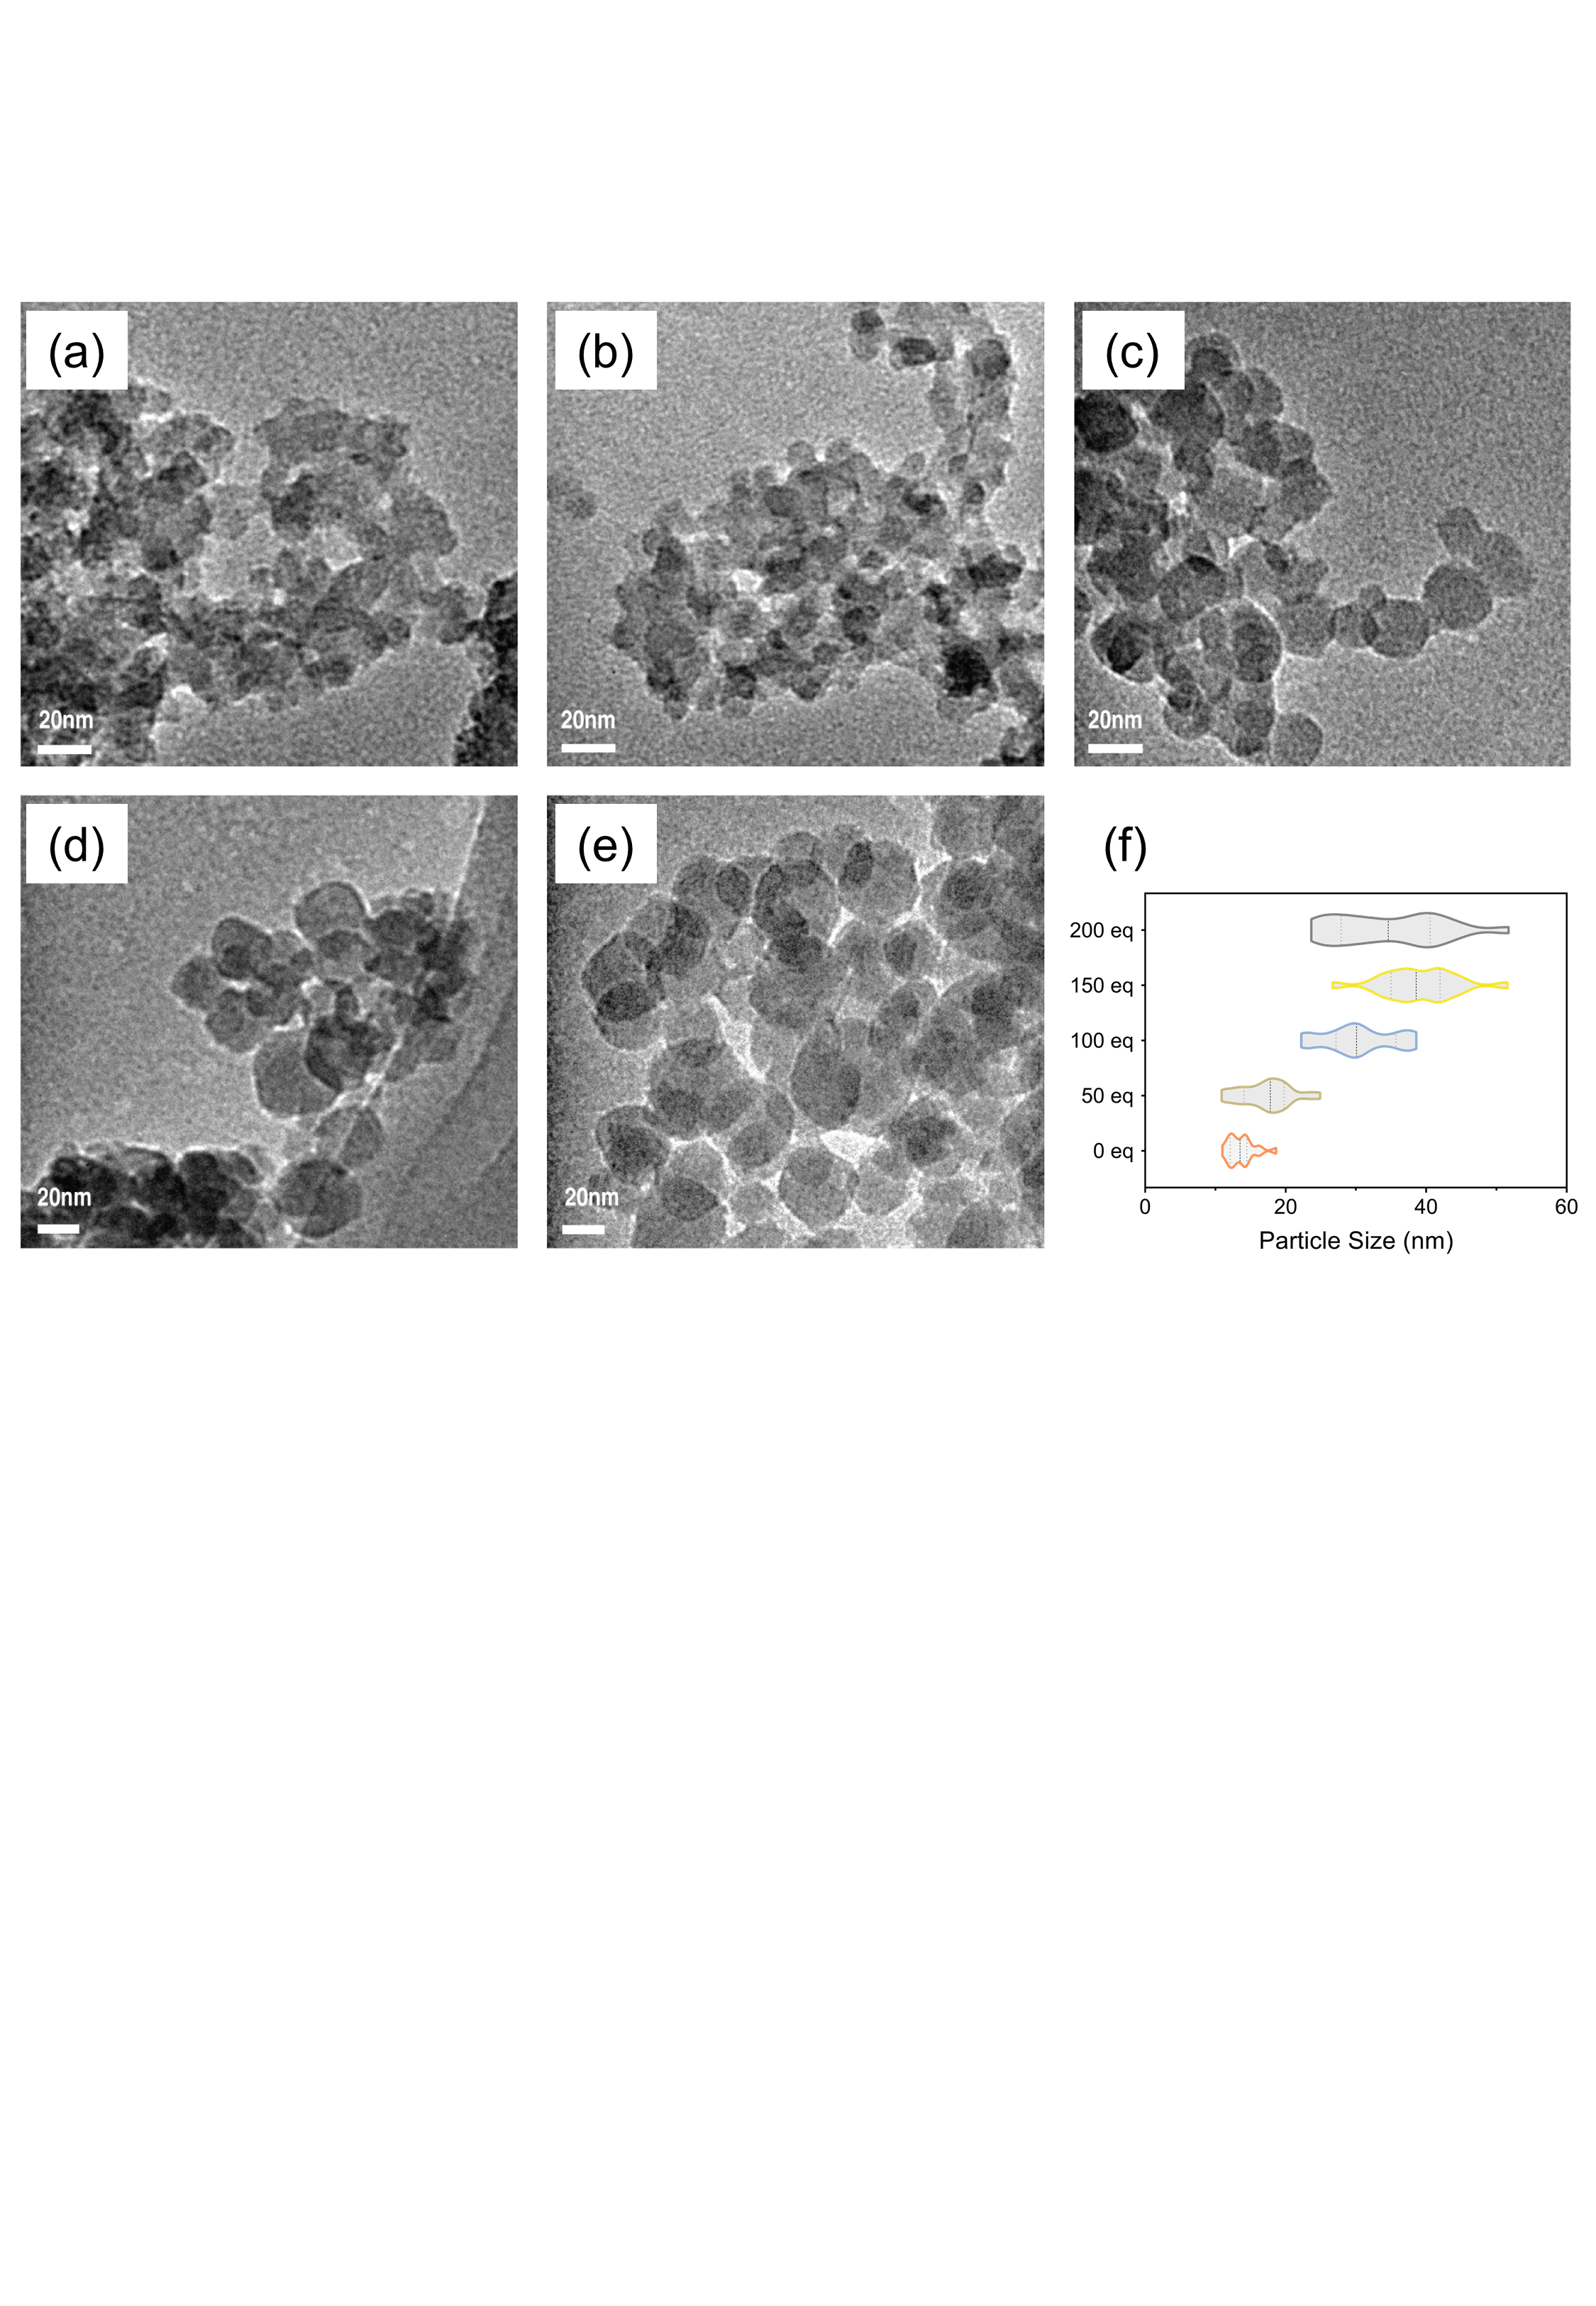


**Figure S1.2.** TEM micrographs of (a) UiO66NH2_0eq, (b) UiO66NH2_50eq, (c) UiO66NH2_100eq, (d) UiO66NH2_150eq and (e) UiO66NH2_200eq; (f) Particle size distribution of UiO66NH2 samples from TEM analysis.

**Table S1.2.** TEM size analysis of UiO66NH2 samples.

| **Sample** | **Particle Size (nm)** | | |
| --- | --- | --- | --- |
| **Min** | **Max** | **Mean** a |
| UiO66NH2_0eq | 11.0 | 18.7 | 13.7 ± 1.8 |
| UiO66NH2_50eq | 10.9 | 24.9 | 17.2 ± 3.6 |
| UiO66NH2_100eq | 22.2 | 38.6 | 30.5 ± 5.0 |
| UiO66NH2_150eq | 26.7 | 51.6 | 39.0 ± 5.3 |
| UiO66NH2_200eq | 23.6 | 51.7 | 34.8 ± 7.6 |
| a At least 20 crystals were selected for size distribution analysis. | | | |


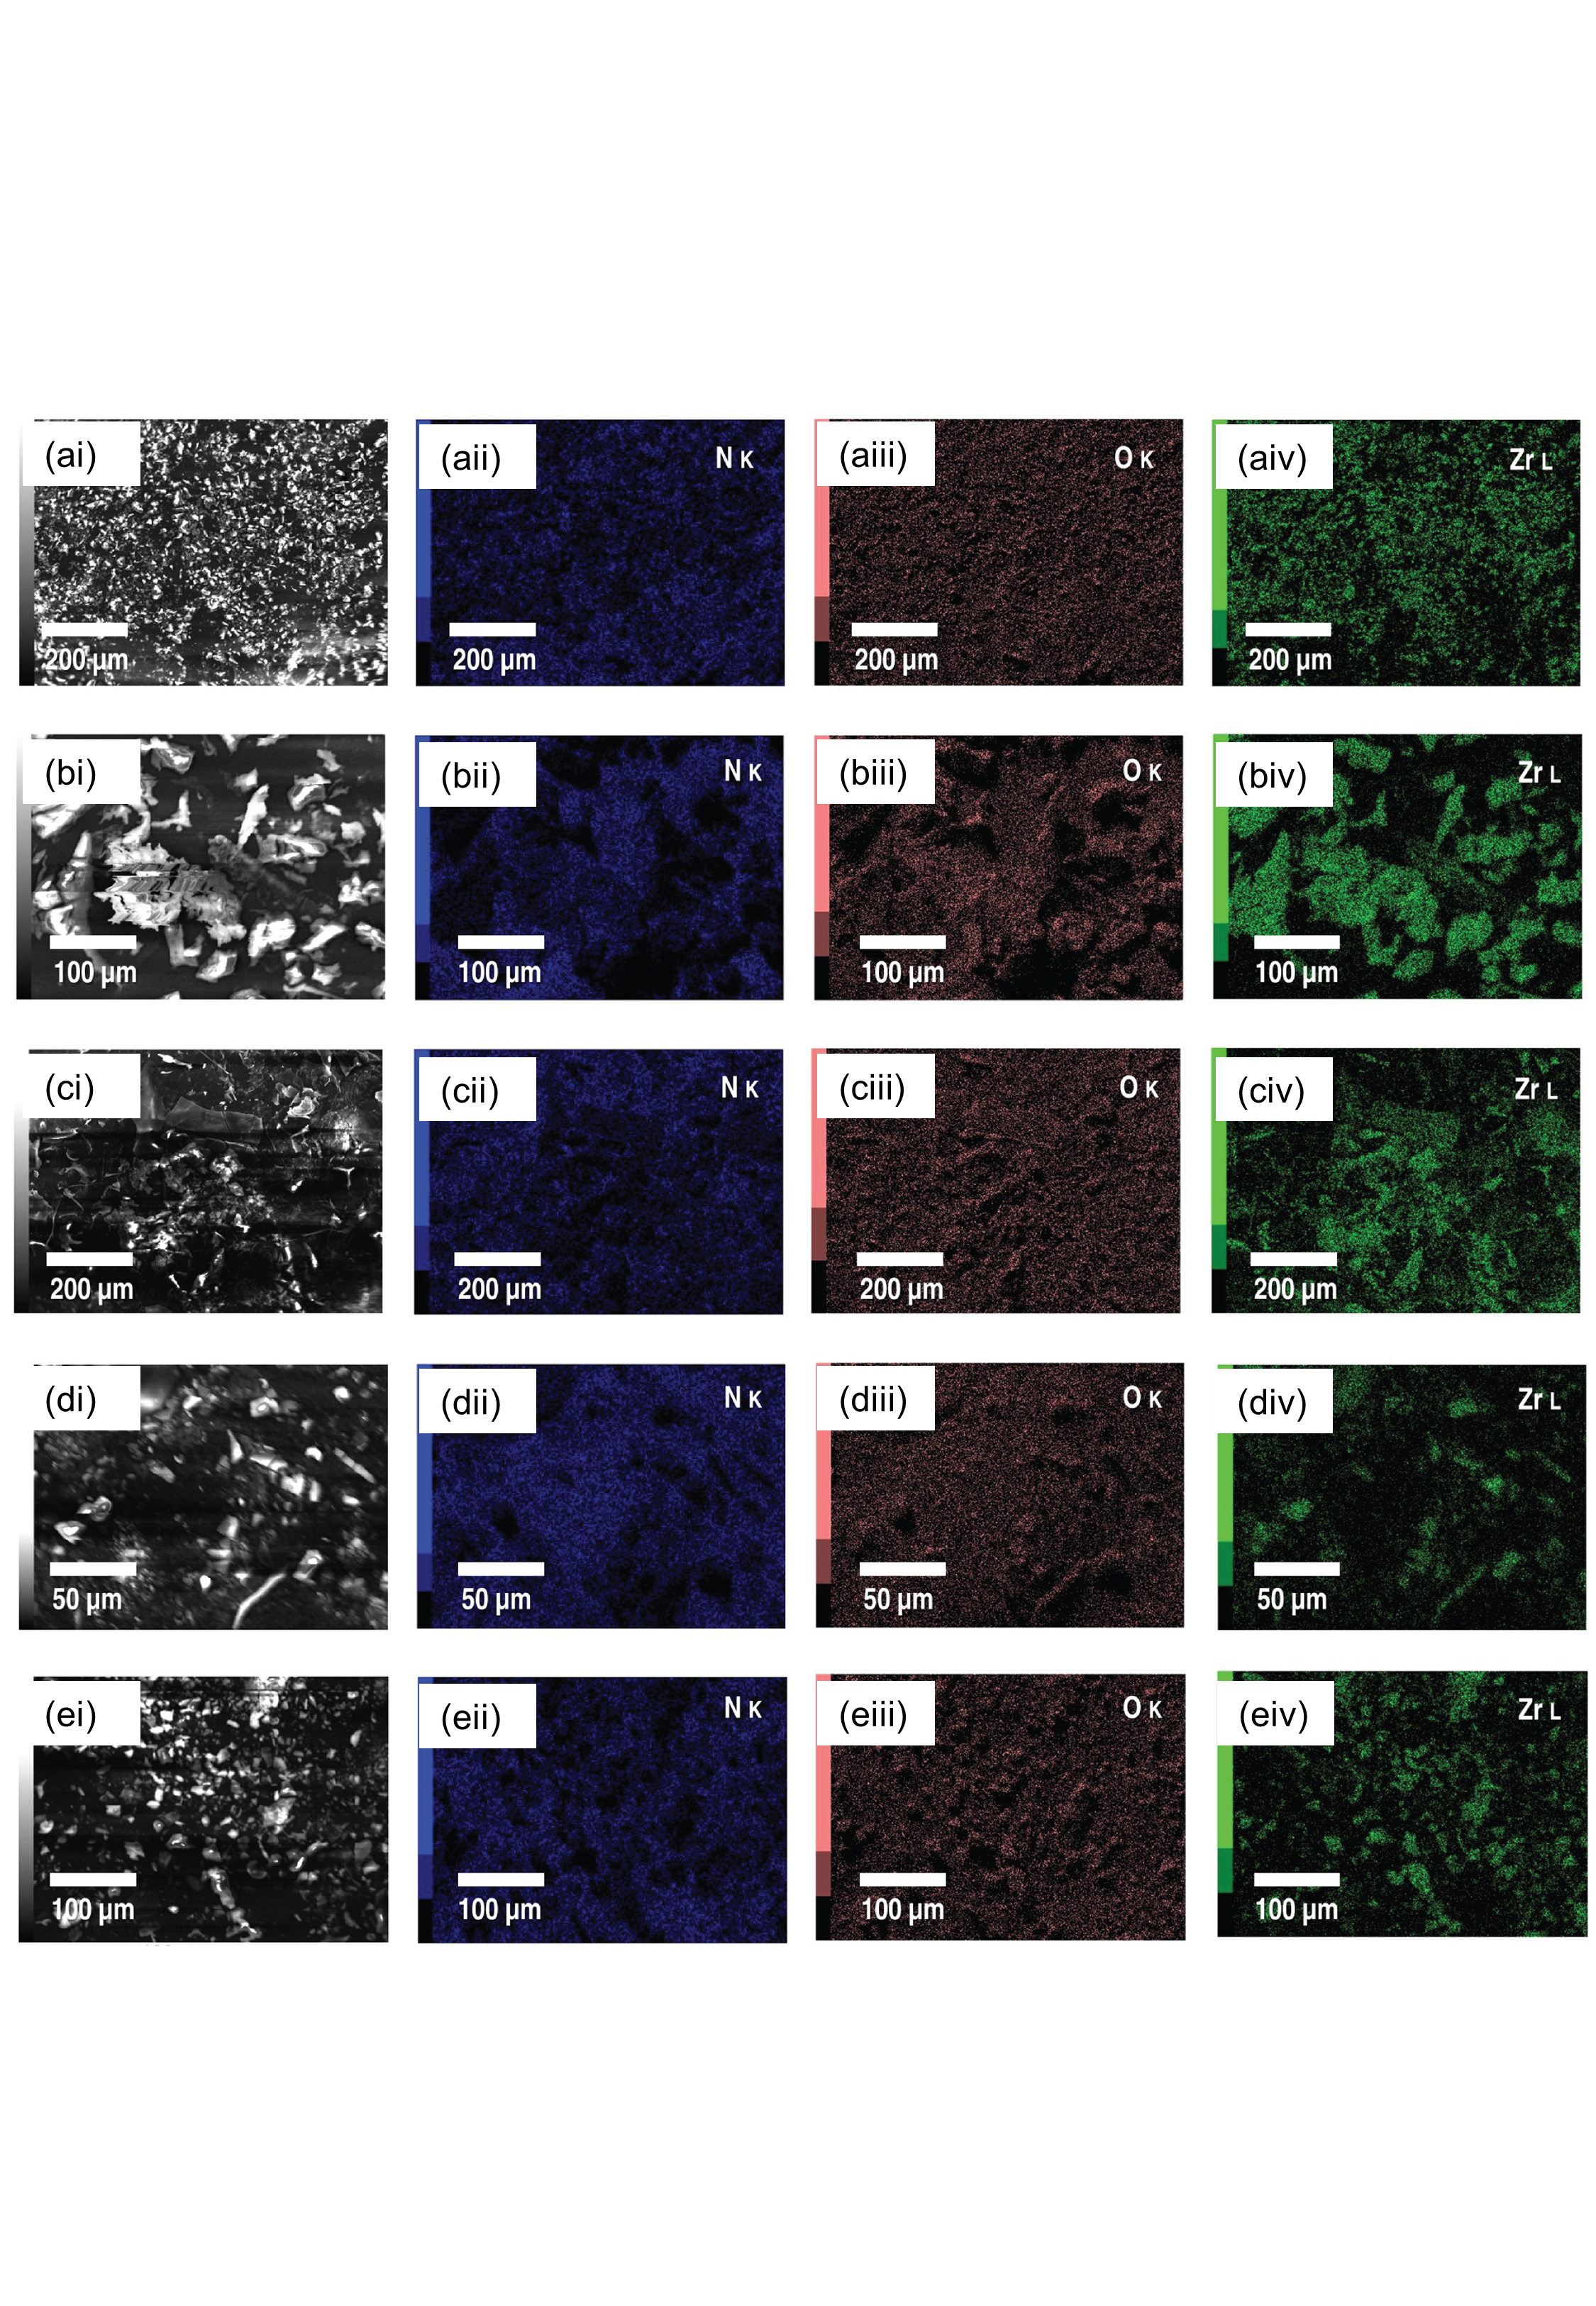


**Figure S1.3.** SEM-EDX micrographs of (ai) – (aiv). UiO66NH2_0eq, (bi) – (biv). UiO66NH2_50eq, (ci) – (civ). UiO66NH2_100eq, (d) – (div). UiO66NH2_150eq and (ei) – (eiv). UiO66NH2_200eq (elements identified: nitrogen, oxygen and zirconium).


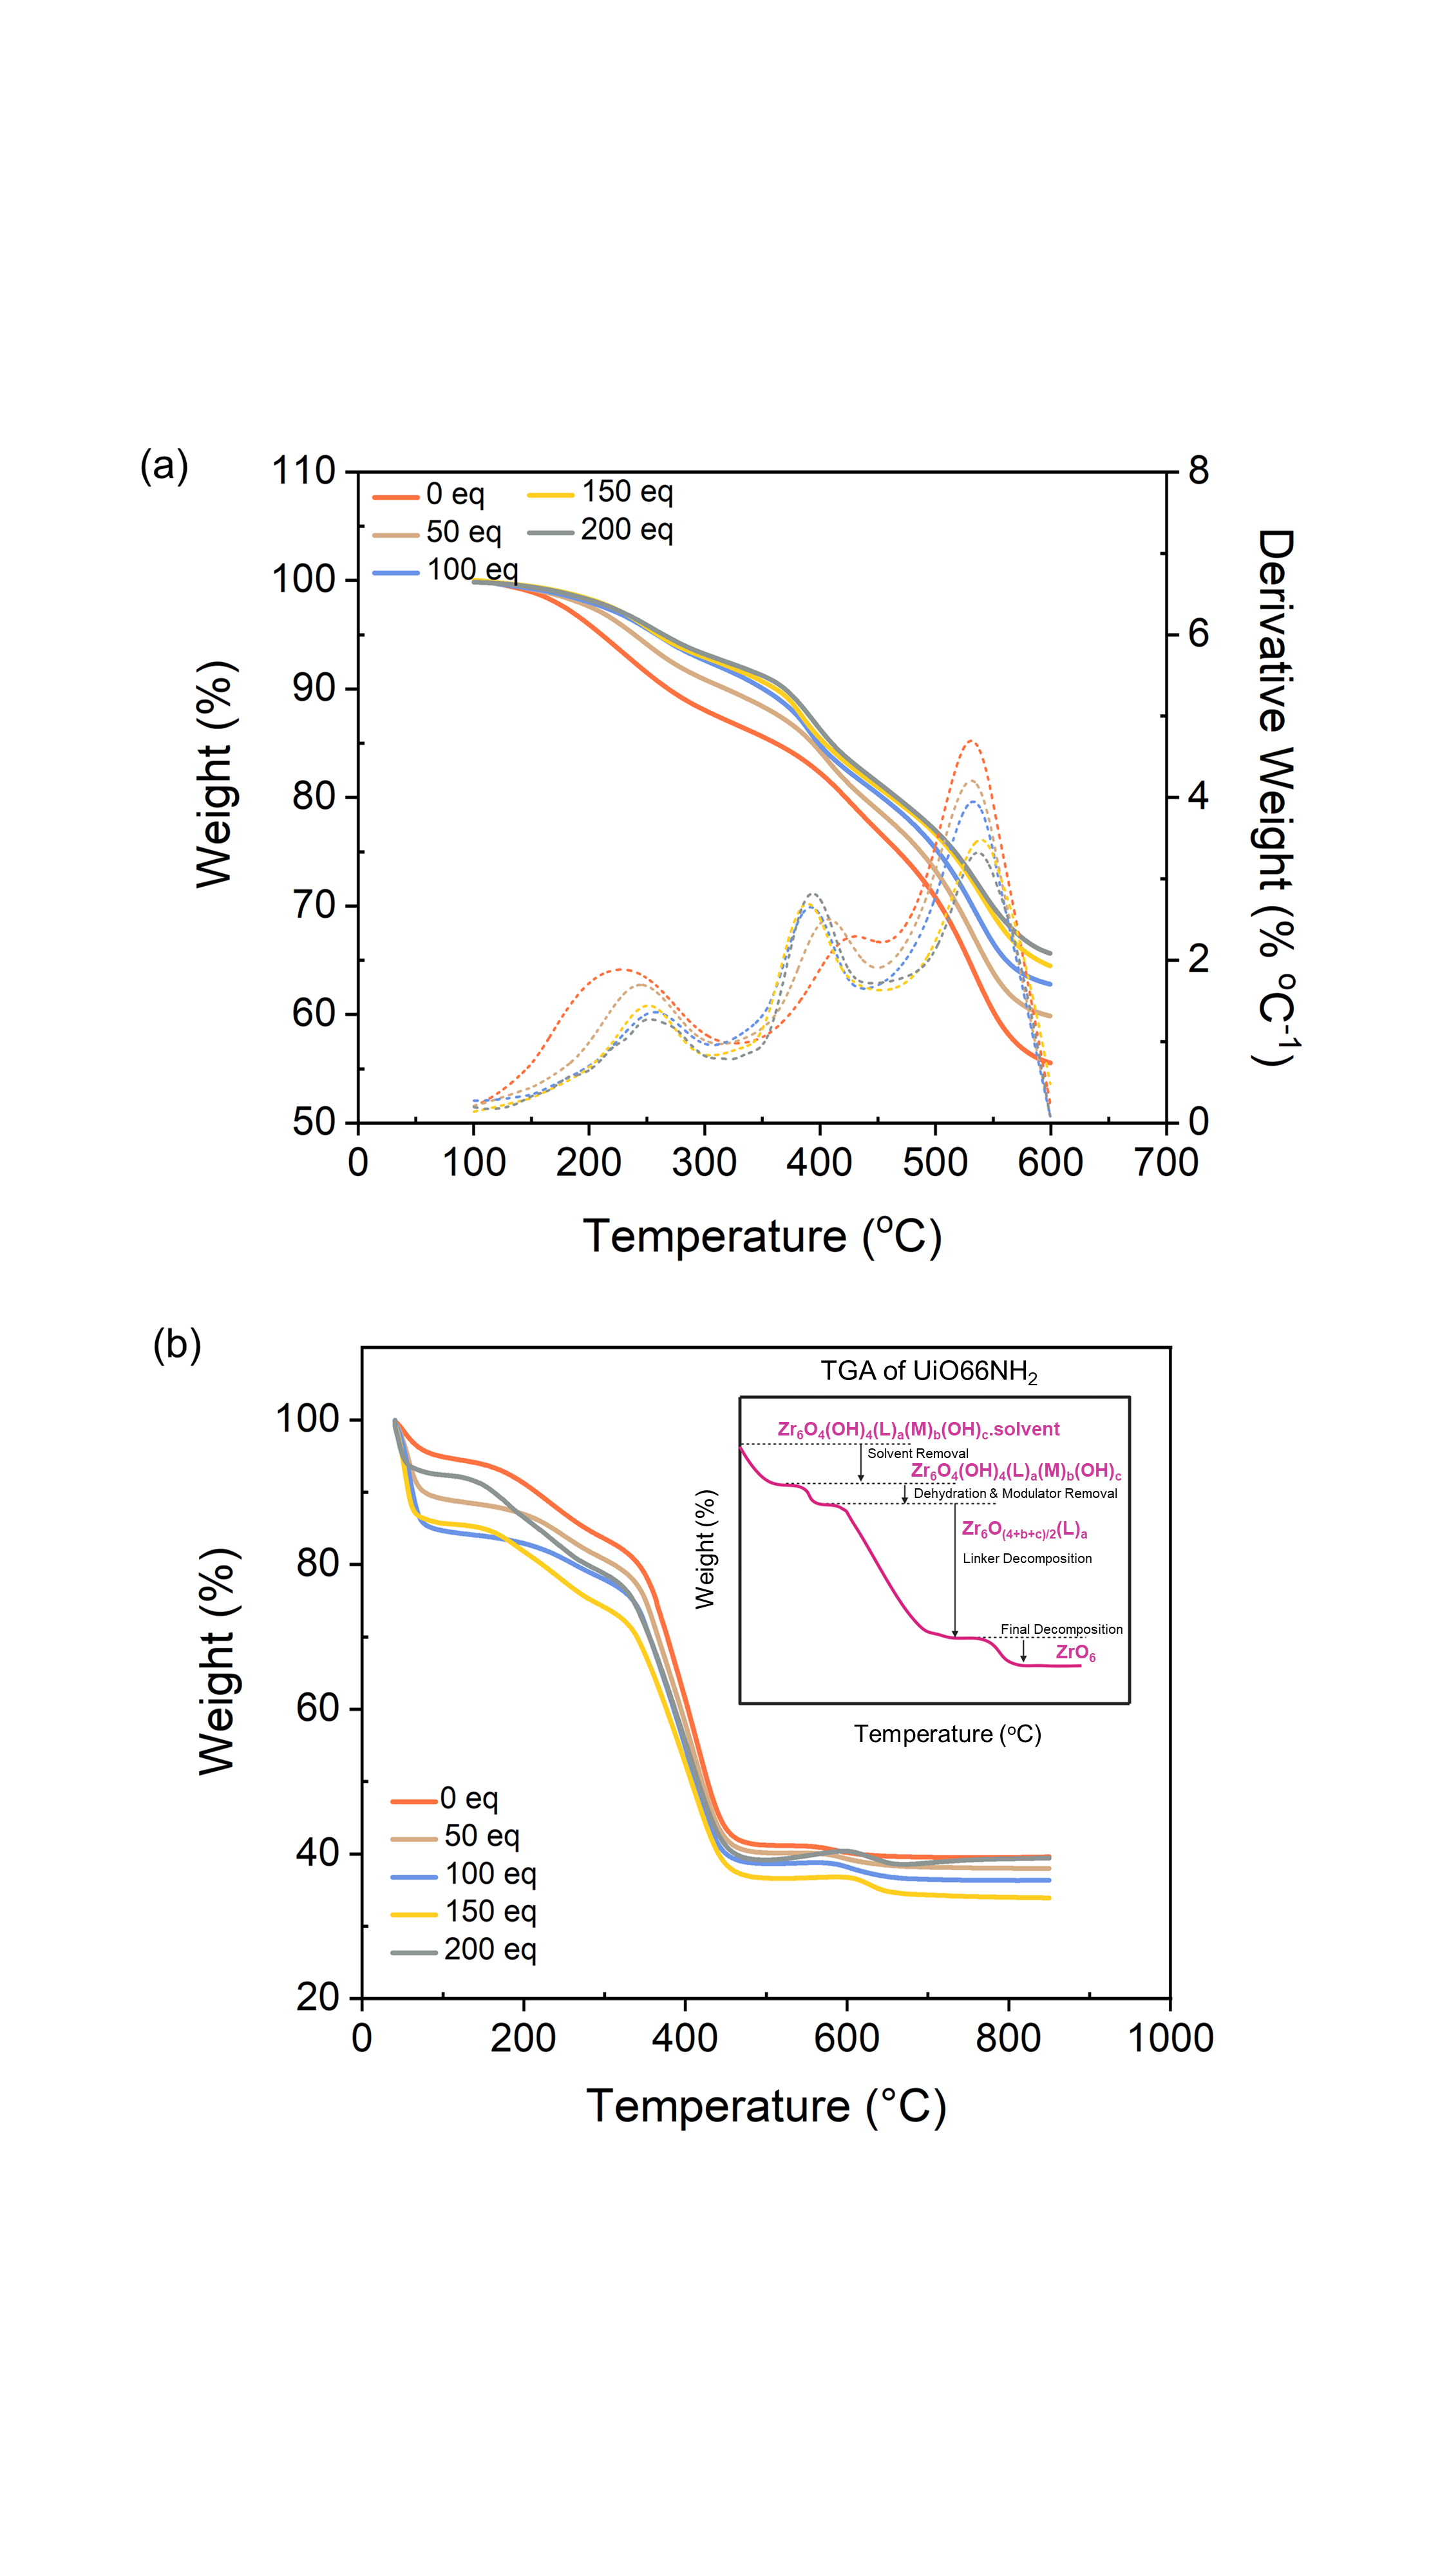


**Figure S1.4.** (a) TGA degradation and derivative profile, and (b) defect quantitation from TGA analysis of UiO66NH2 samples.

**Table S1.3.** TGA defect analysis of UiO66NH2 samples.

| **Sample** | **TGA Defect Analysis** | | | |
| --- | --- | --- | --- | --- |
| **Ligands/fu** a | **Defects/fu** a | **% Defects** | **Theoretical Dehydration Mass %** |
| UiO66NH2_0eq | 5.0 | 1.0 | 16.8 | 210.1 |
| UiO66NH2_50eq | 5.1 | 0.9 | 15.7 | 211.7 |
| UiO66NH2_100eq | 5.1 | 0.9 | 14.5 | 213.2 |
| UiO66NH2_150eq | 5.3 | 0.7 | 11.2 | 217.6 |
| UiO66NH2_200eq | 4.5 | 1.5 | 25.2 | 199.0 |
| a “fu” refers to formula unit of the crystal. | | | | |


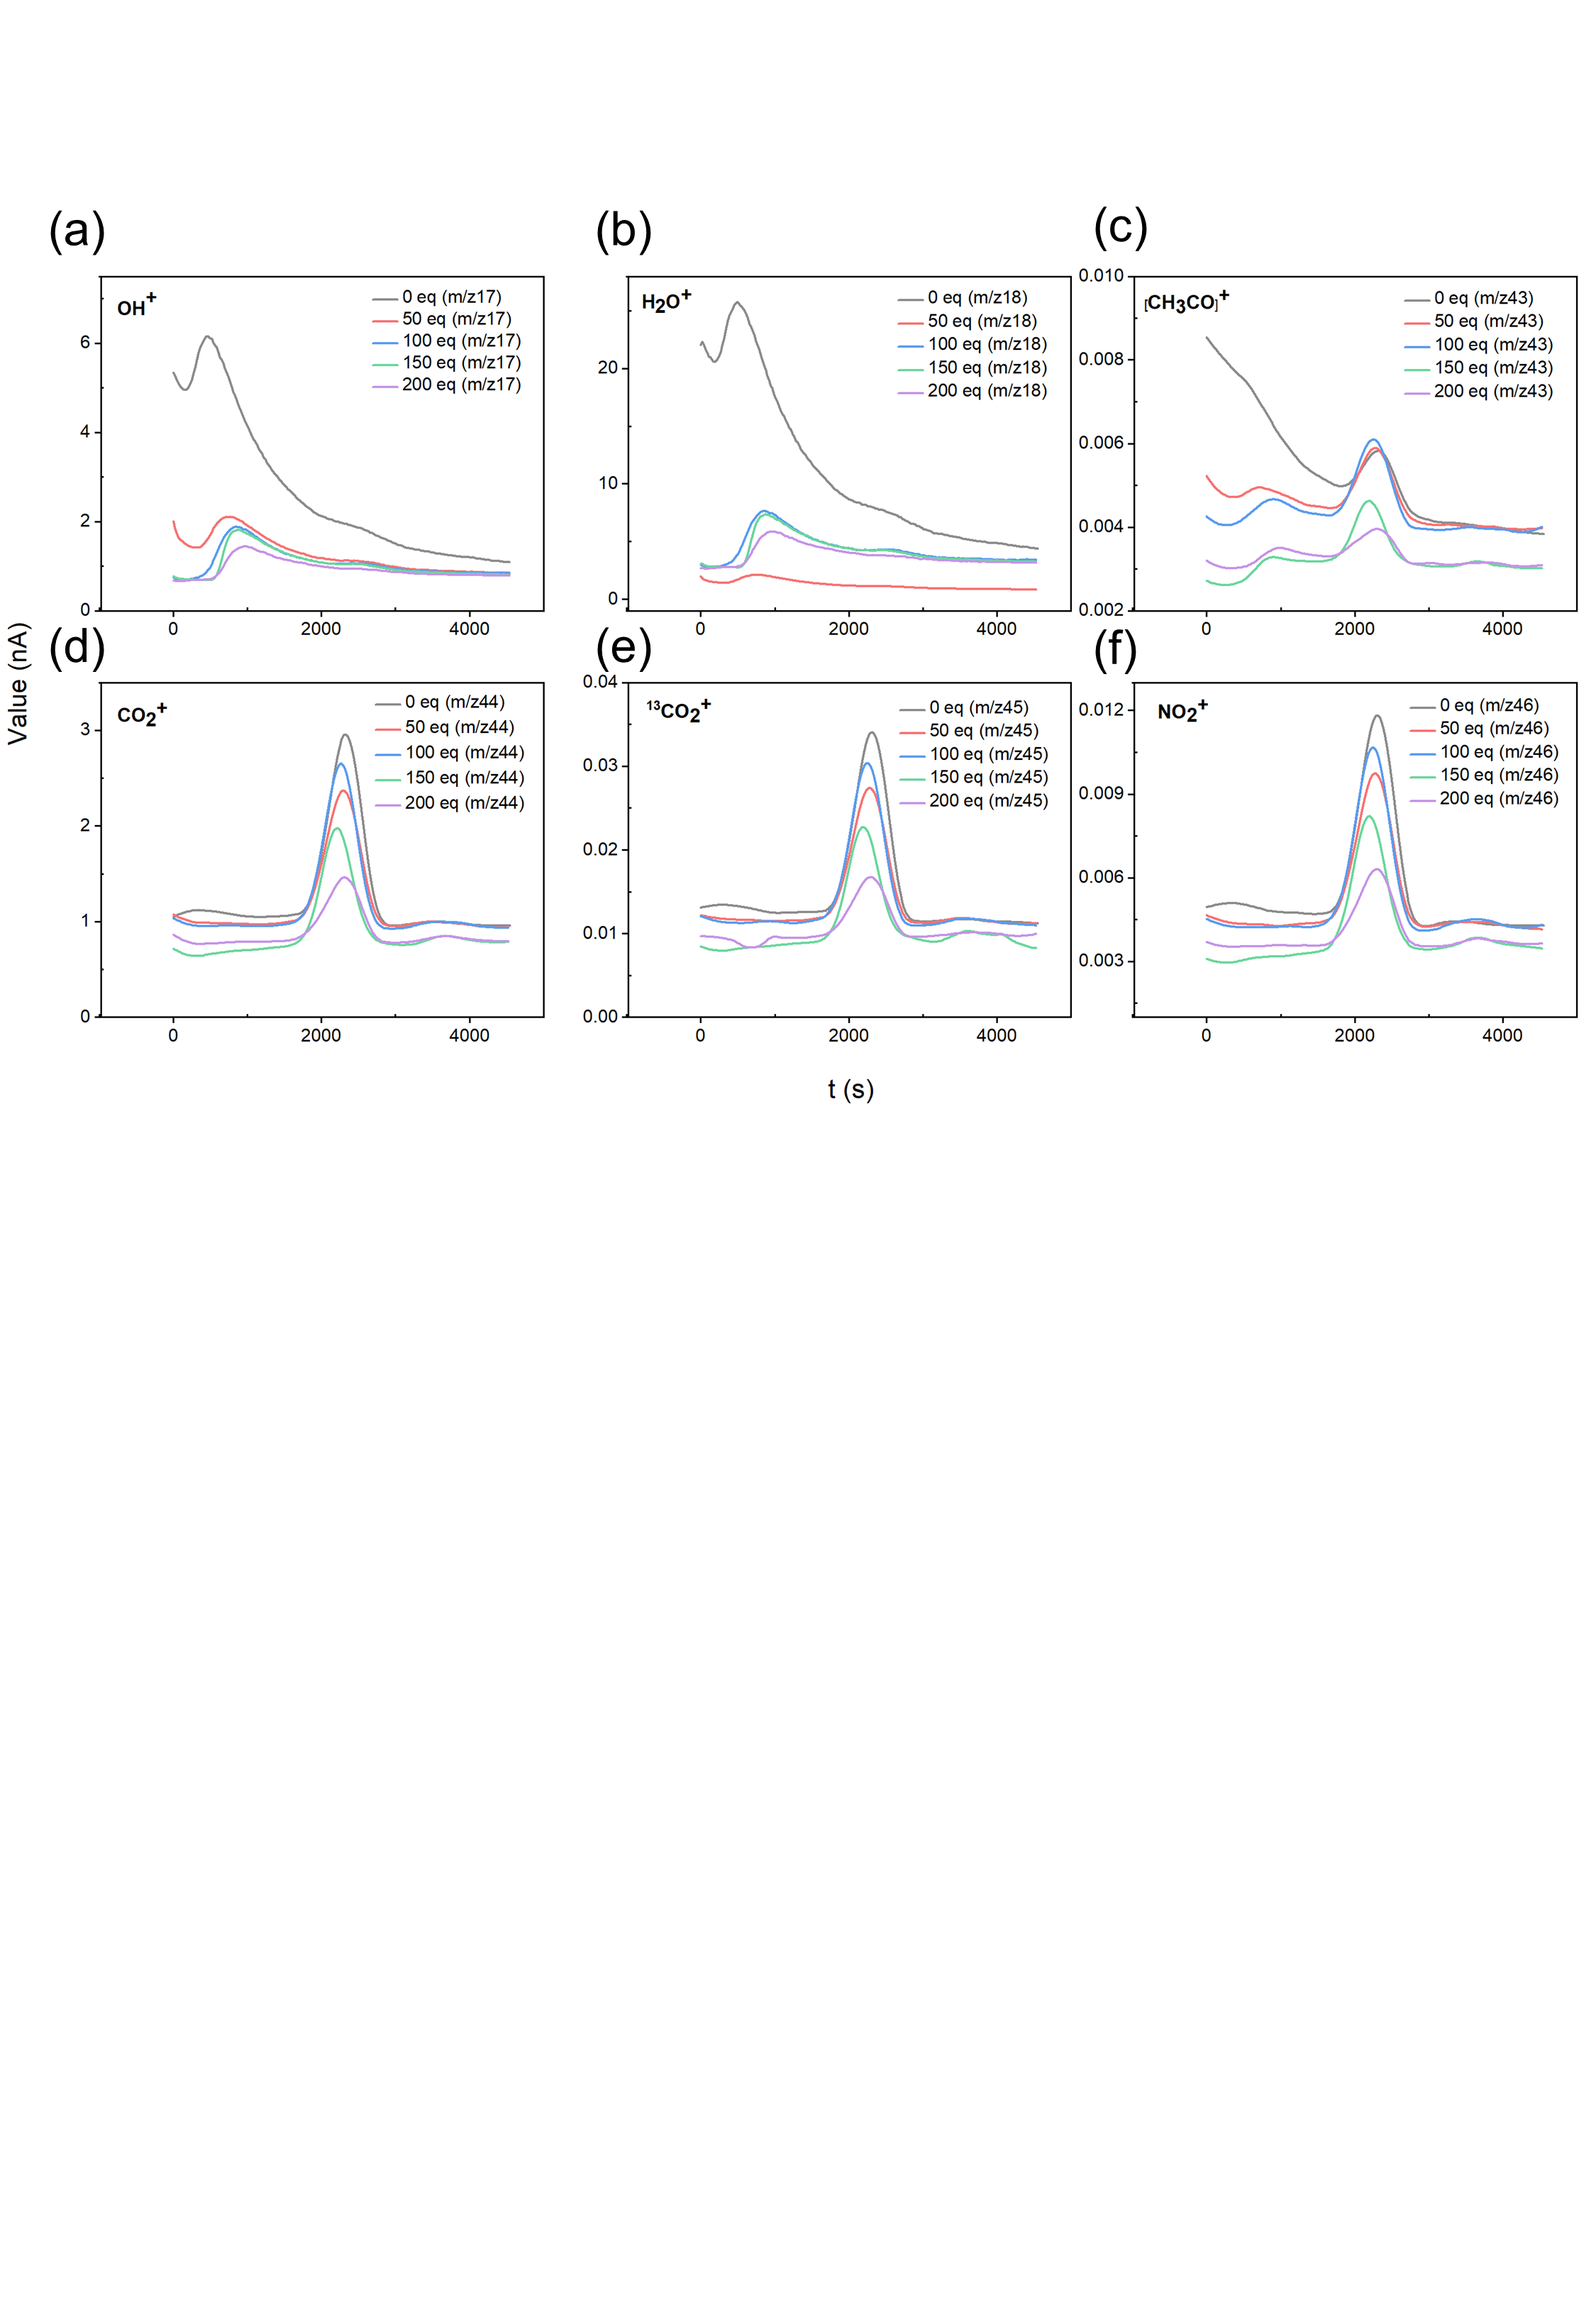


**Figure S1.5.** Respective TGA-MS spectra on (a) – (f) OH+, H2O+, [CH3CO]+, CO2+, 13CO2+ and NO2+ of UiO66NH2 samples.

**Table S1.4.** TGA-MS analysis of UiO66NH2 samples.

| **Sample** | **Integral (nsA)** | | | | |
| --- | --- | --- | --- | --- | --- |
| **OH+** | **H2O+** | **[CH3CO]+** | **CO2+** | **NO2+** |
| UiO66NH2_0eq | 851.71 | 3664.17 | 0.55 | 1032.2 | 4.14 |
| UiO66NH2_50eq | 572.28 | 559.62 | 0.82 | 764.39 | 2.97 |
| UiO66NH2_100eq | 869.93 | 3430.03 | 0.90 | 855.25 | 3.40 |
| UiO66NH2_150eq | 785.01 | 3052.87 | 0.80 | 615.93 | 2.51 |
| UiO66NH2_200eq | 543.03 | 2119.84 | 0.42 | 375.76 | 1.67 |
|  | | | | | |

# **Modulator effect on bonding environments of synthesized UiO66NH2**


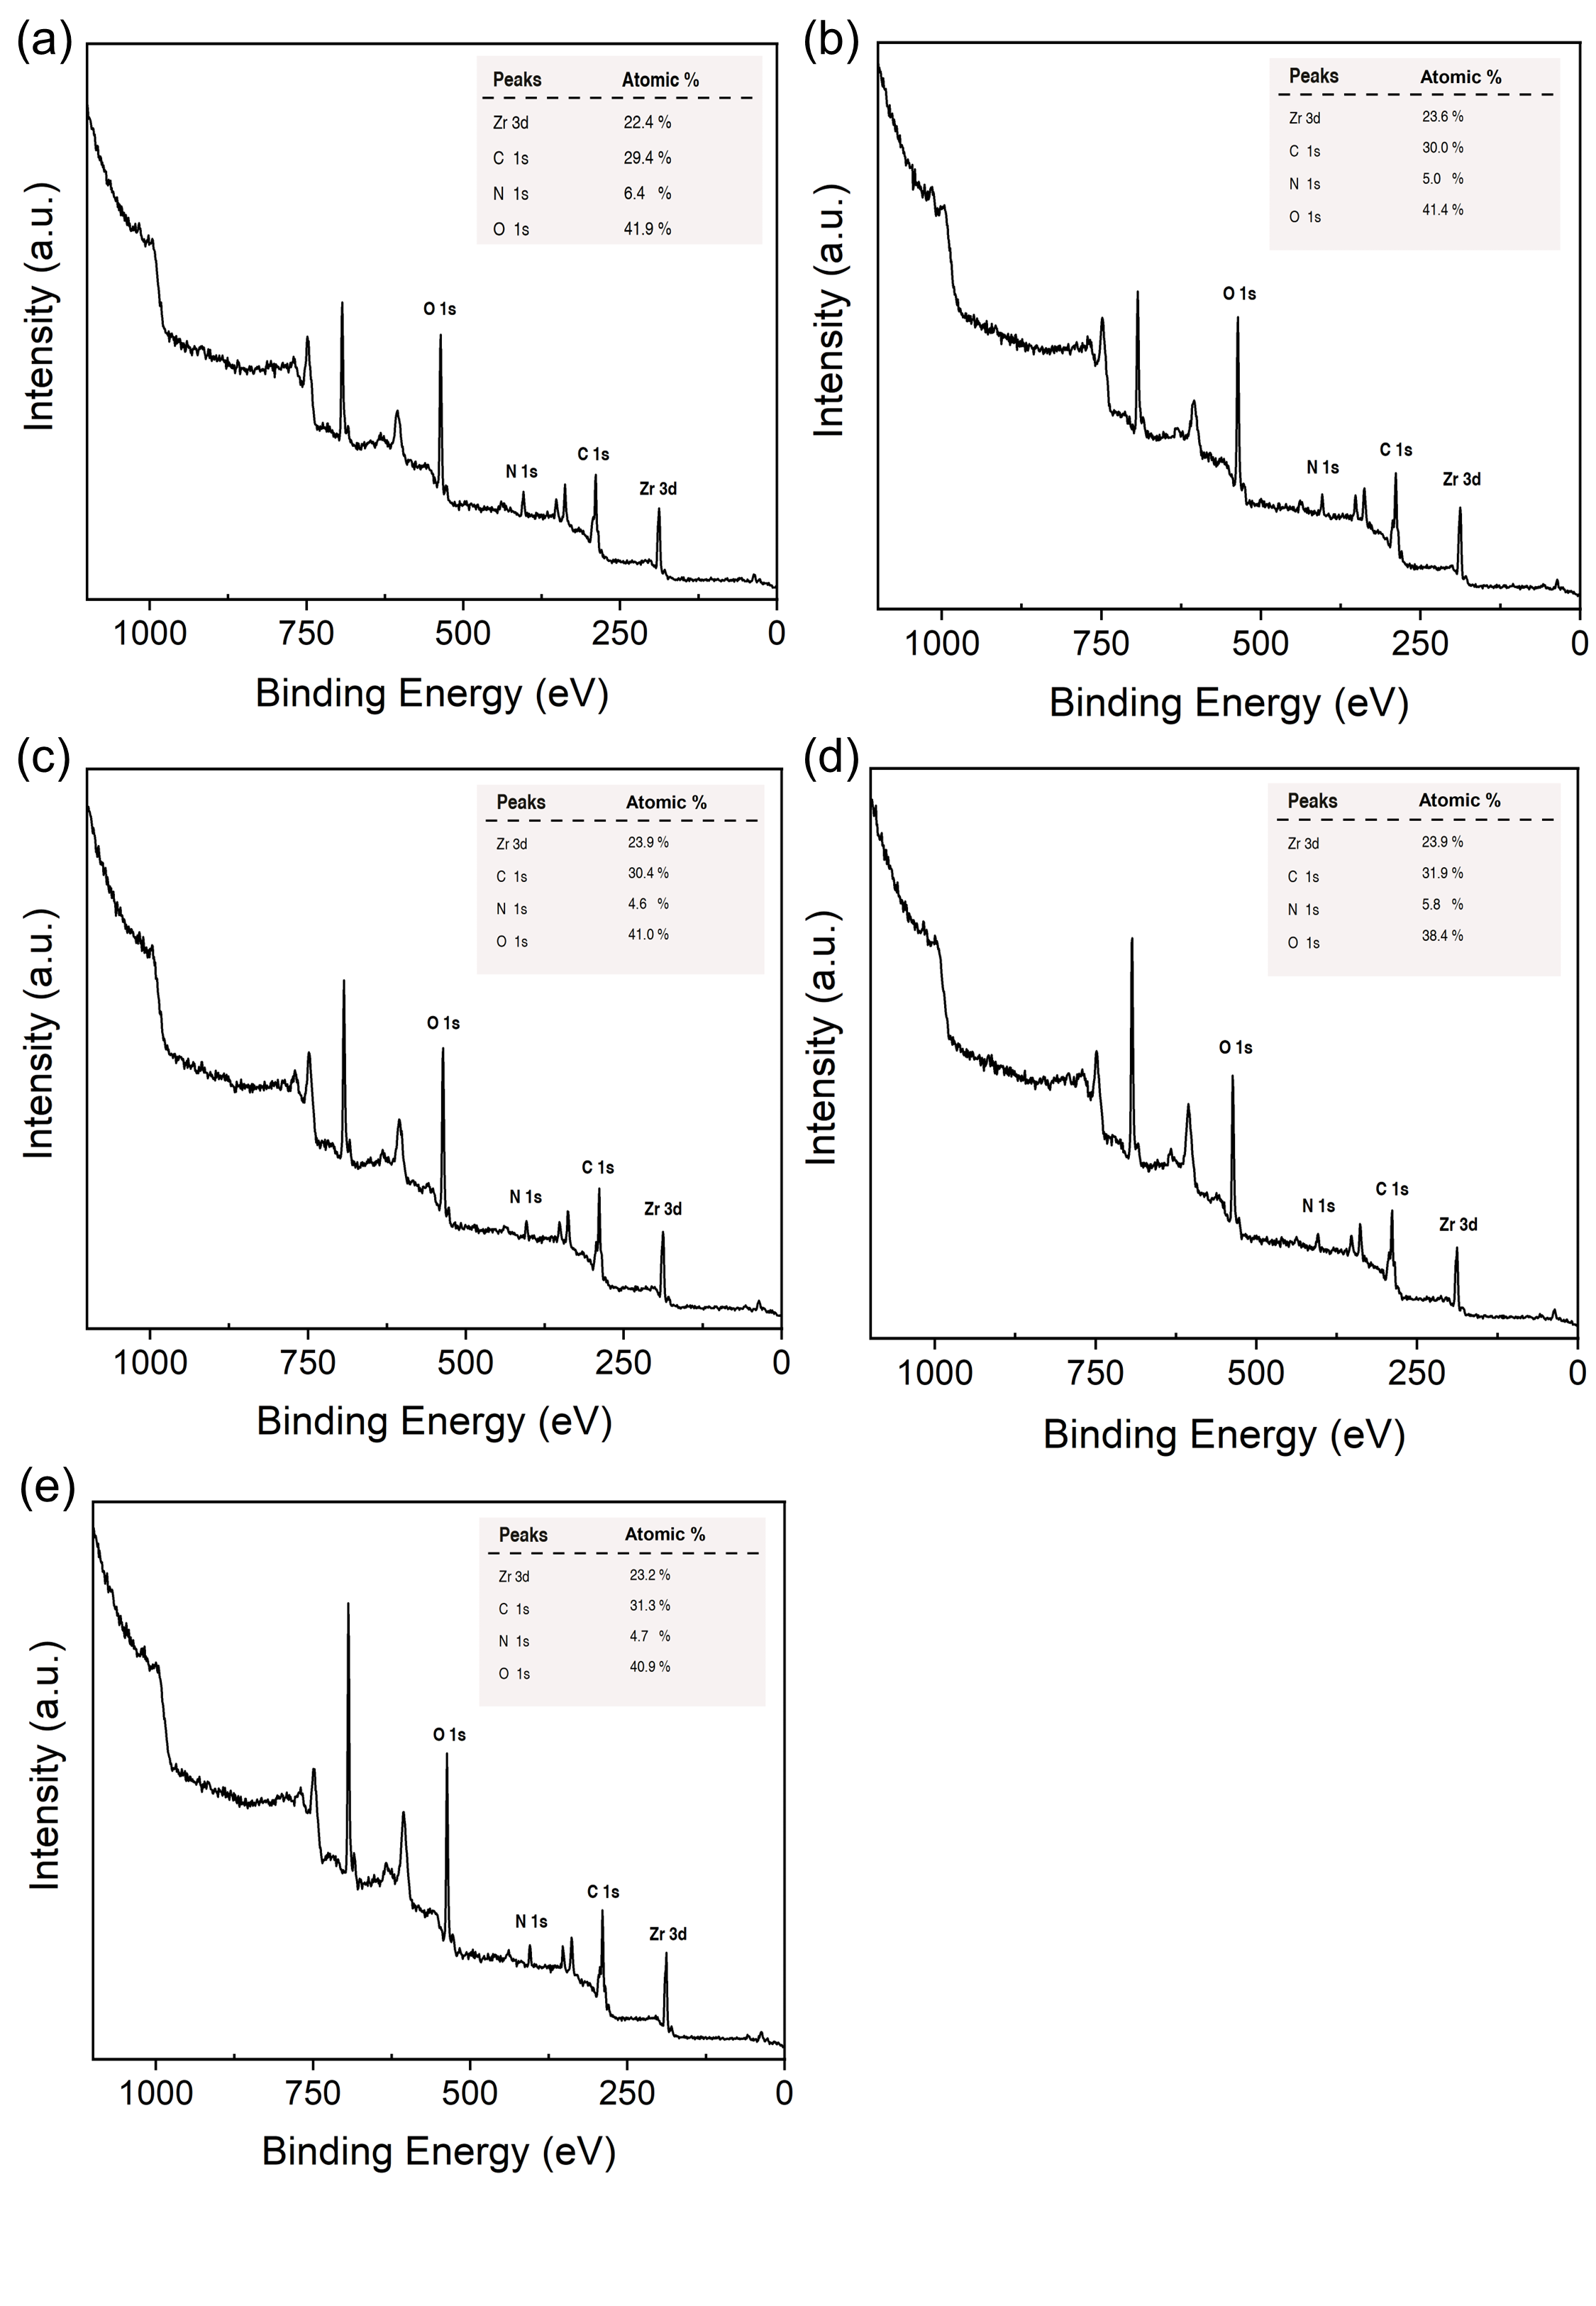


**Figure S3.1. a.** Survey XPS spectra of (a) UiO66NH2_0eq, (b) UiO66NH2_50eq, (c) UiO66NH2_100eq, (d) UiO66NH2_150eq, and (e) UiO66NH2_200eq. The percentage atomic concentrations of C, N, O, and Zr are tabulated in each spectrum.


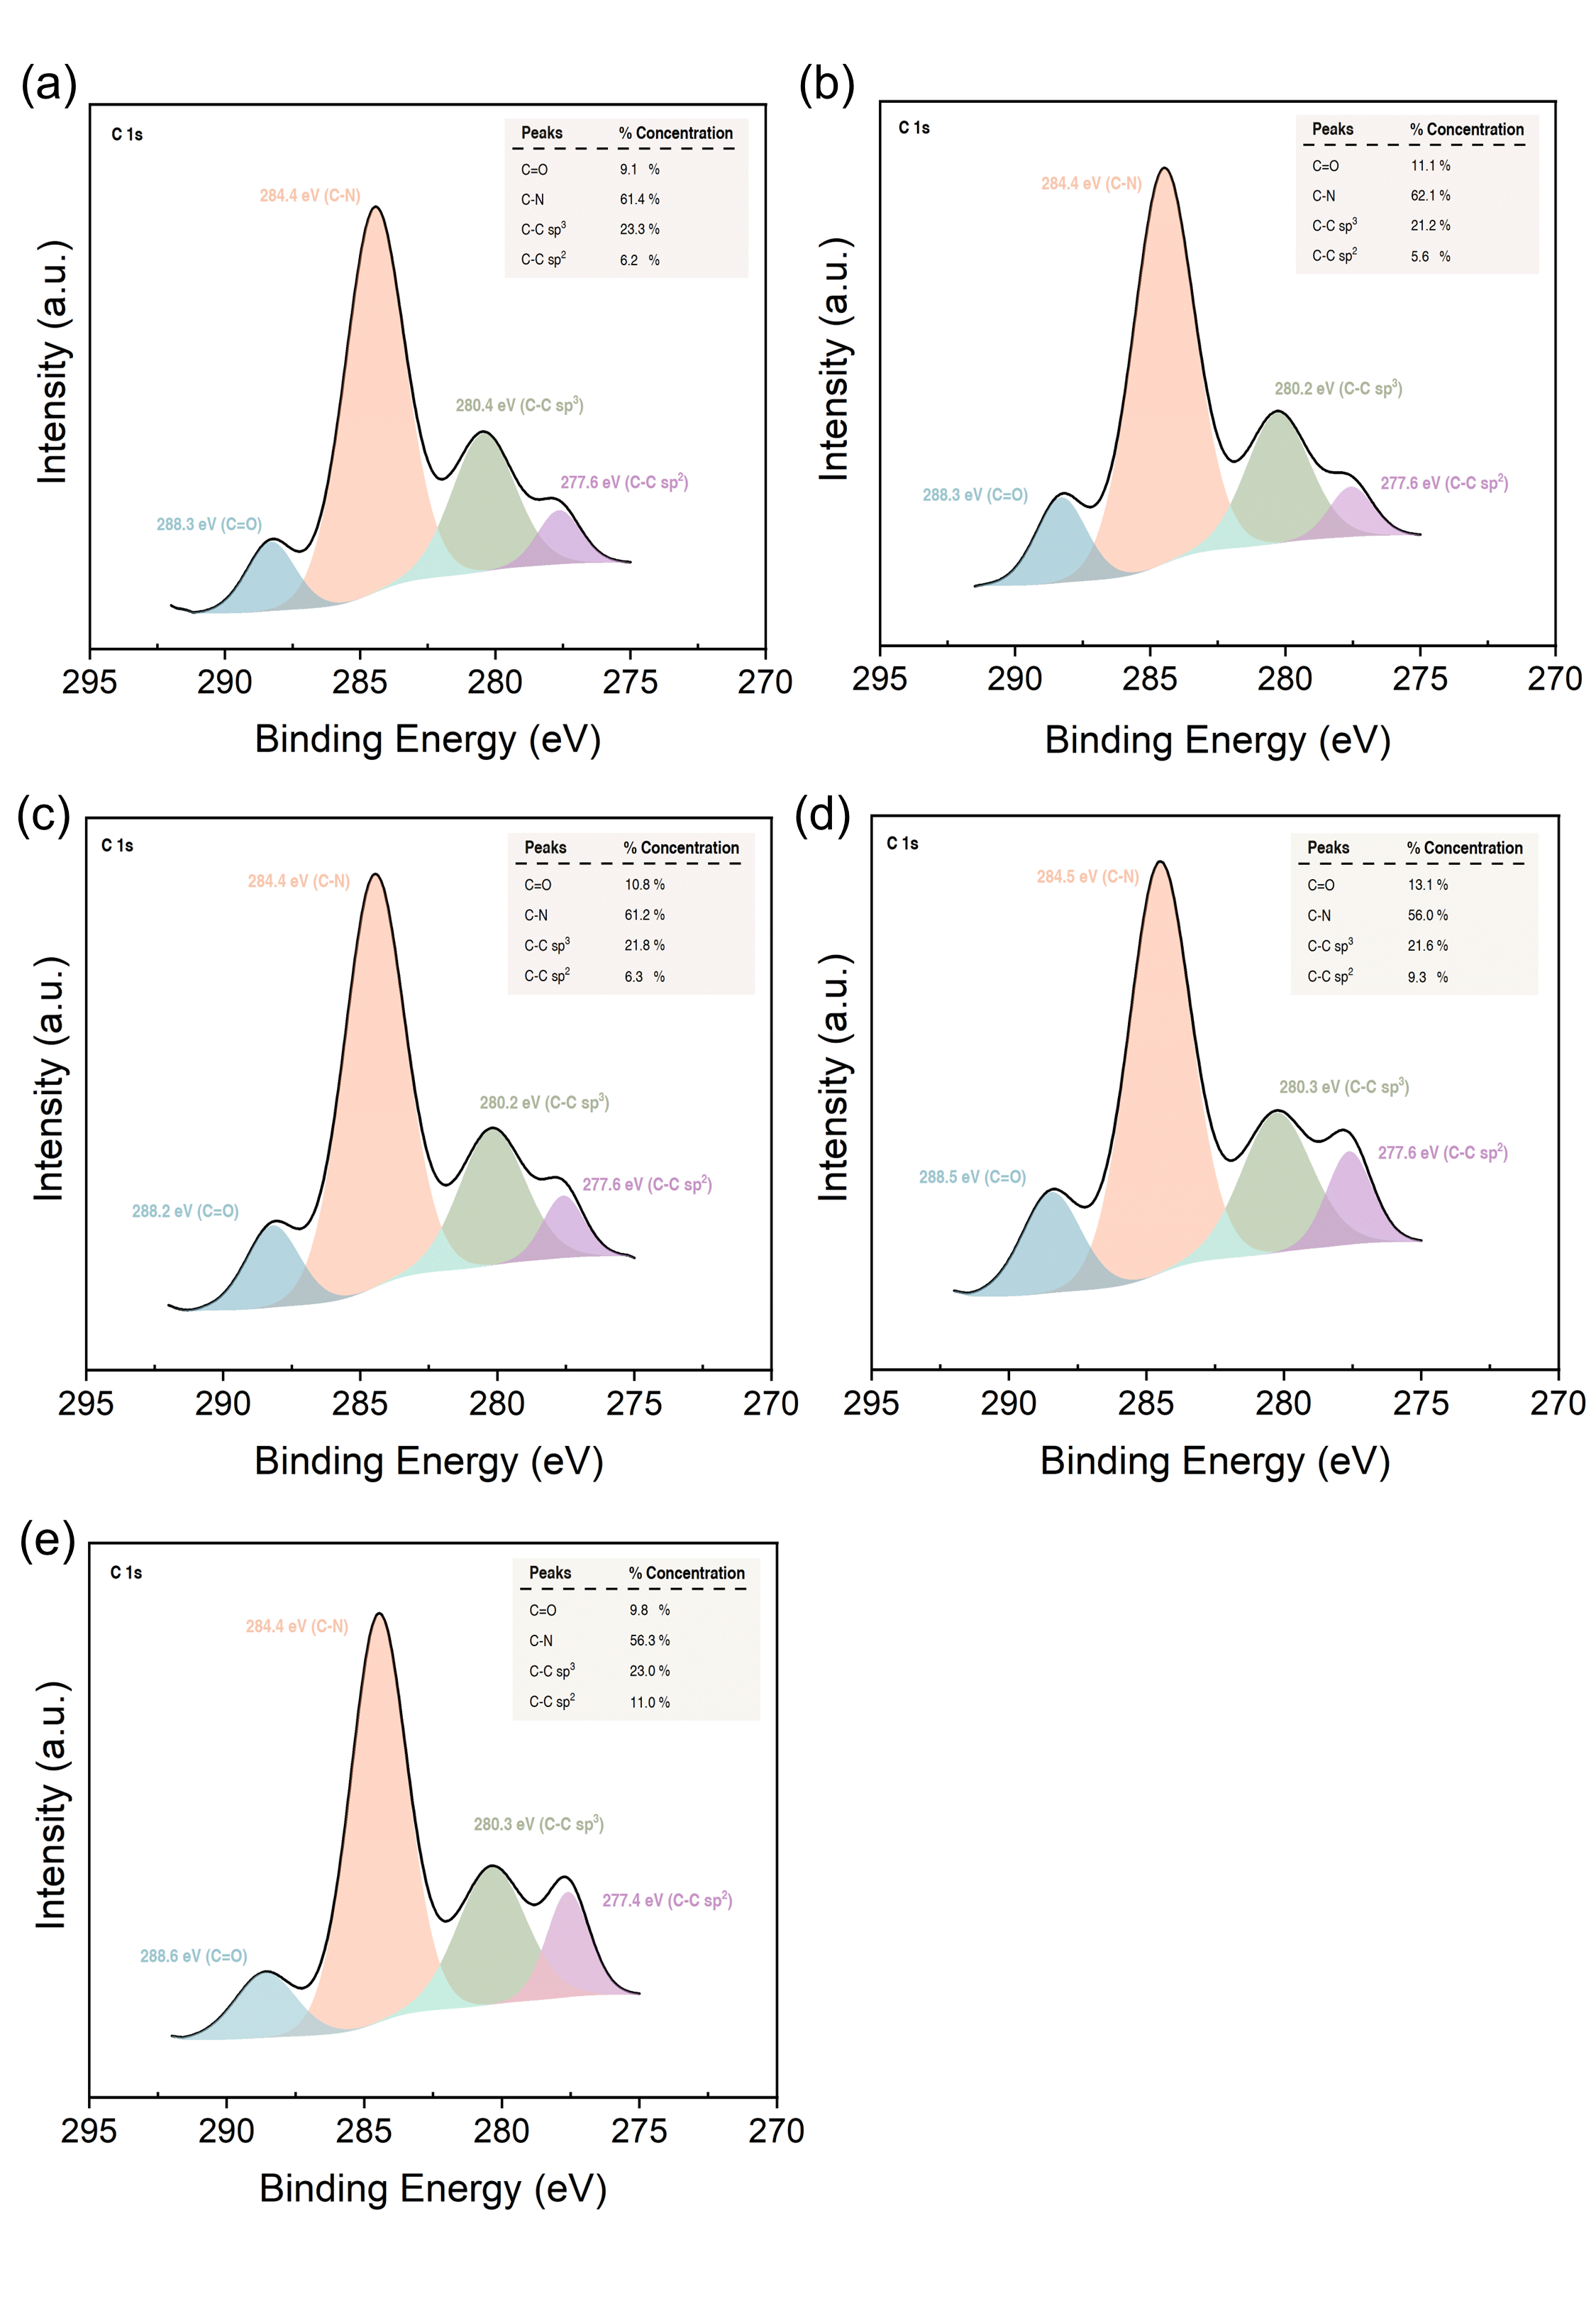


**Figure S3.2.** Deconvoluted high-resolution C 1s XPS spectra of (a) UiO66NH2_0eq, (b) UiO66NH2_50eq, (c) UiO66NH2_100eq, (d) UiO66NH2_150eq, and (e) UiO66NH2_200eq. The percentage atomic concentrations of C, N, O, and Zr are tabulated in each spectrum.
